# Supplementary material for: The RNA‐binding protein LARP4 regulates cancer cell migration and invasion
Source: PubMed Central journal article supplement (PMC5111583; doi:10.1002/cm.21336), 2016-09-26

**Figure S1**

**MDA-MB-231**

**F-actin**

**$\alpha$ -tubulin**

**F-actin/ $\alpha$ -tubulin/DAPI**

**Control siRNA**

**LARP4 siRNA2**

**LARP4 siRNA4**

**PC3**

**Control siRNA**

**LARP4 siRNA2**

**LARP4 siRNA4**

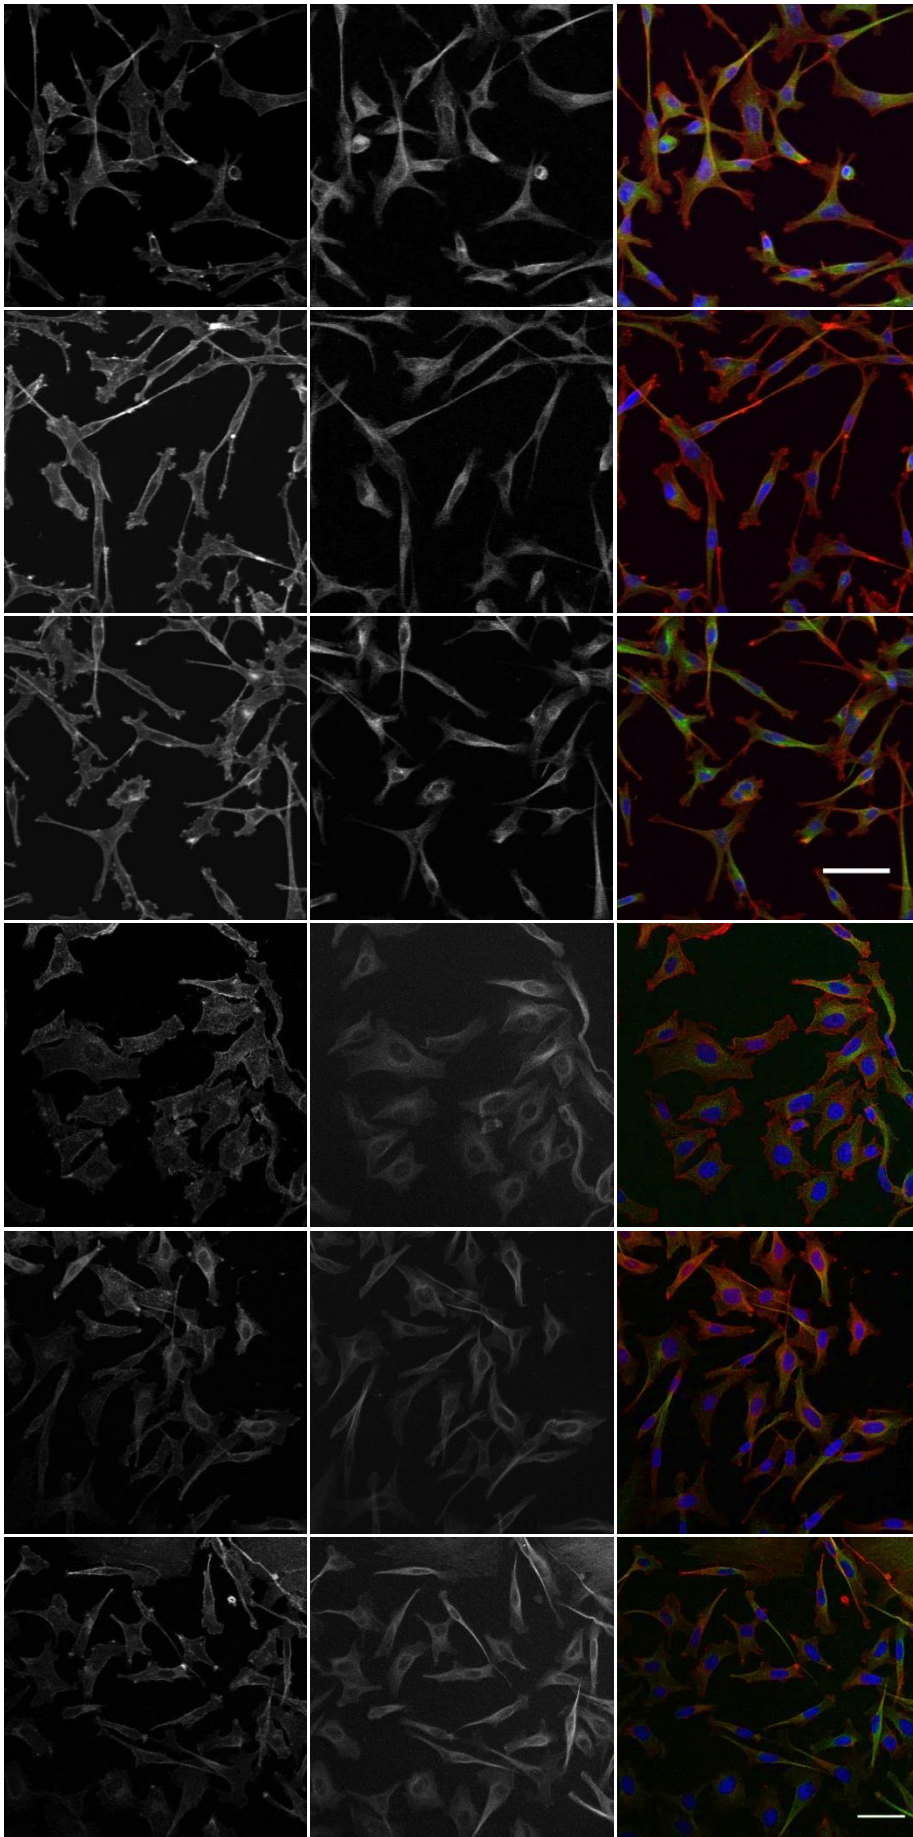

Figure S2

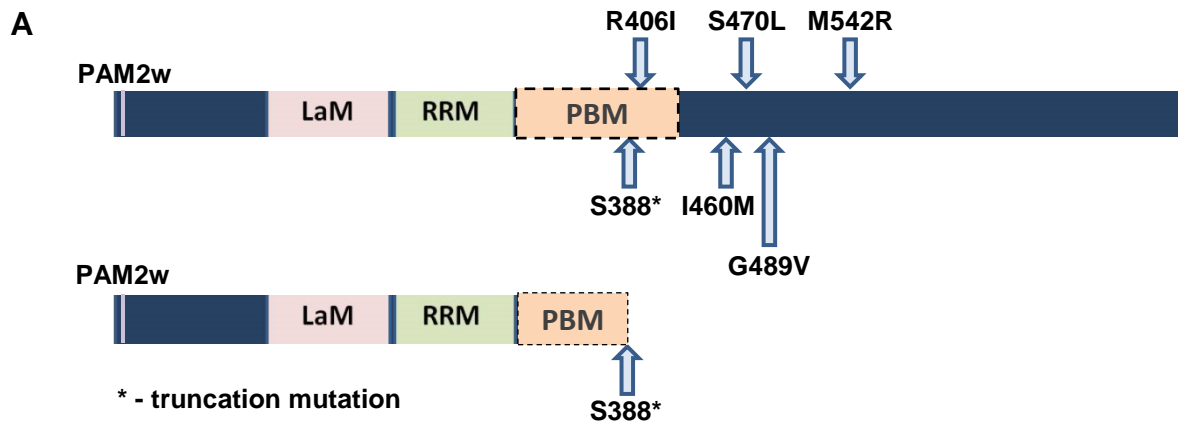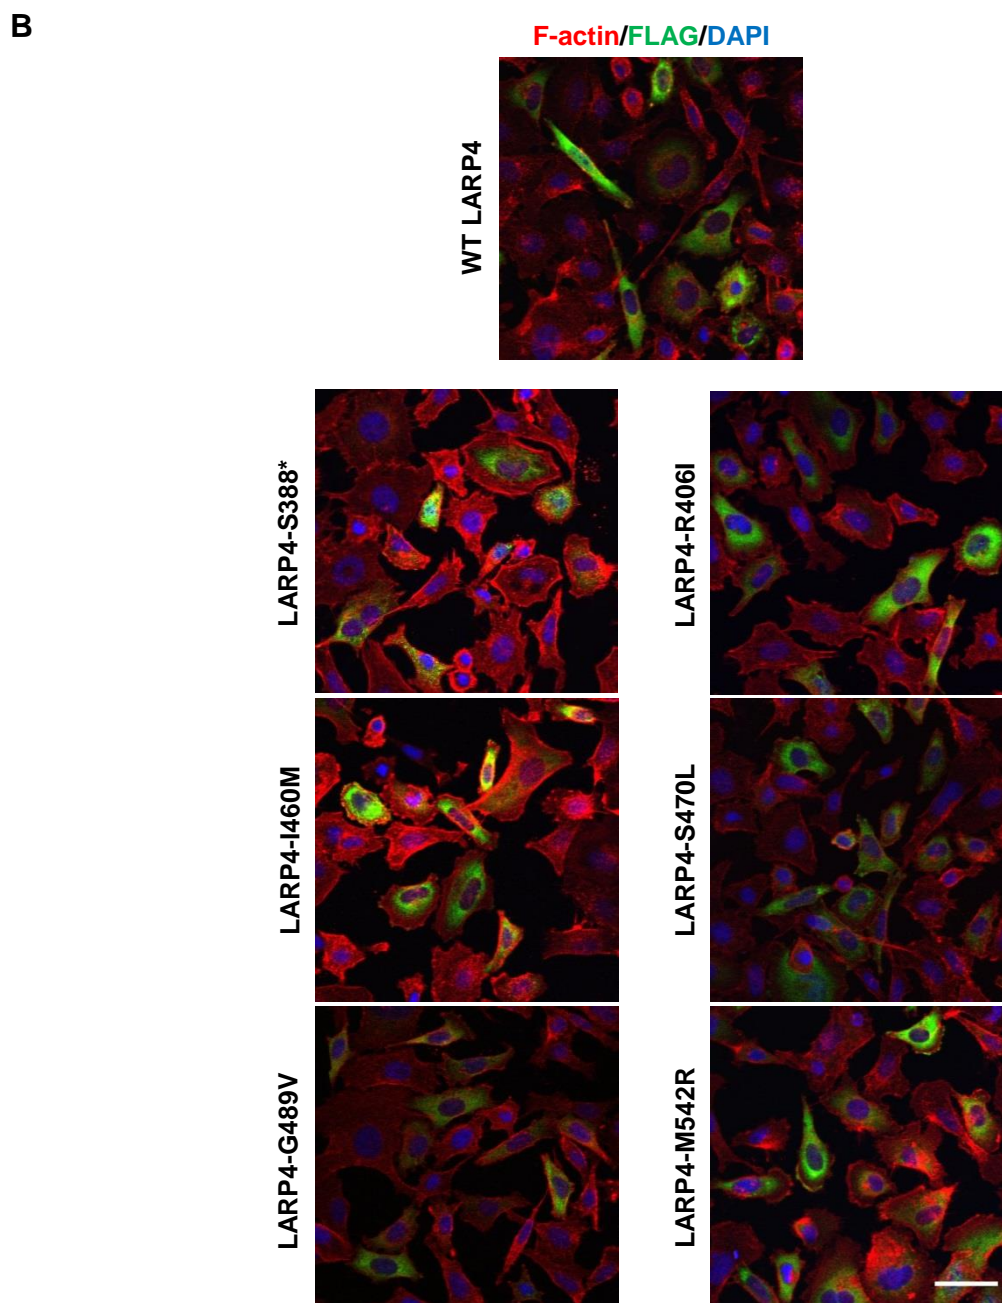

Supplement: CM-73-680-s001.pdf [file CM-73-680-s001.pdf]
